## Single-molecule sequencing of the *Drosophila serrata* genome

Scott L. Allen<sup>1</sup>, Emily K. Delaney<sup>2</sup>, Artyom Kopp<sup>2</sup>, Stephen F. Chenoweth<sup>1\*</sup>

1. School of Biological Sciences, The University of Queensland, QLD 4072, Australia.
  2. Department of Evolution and Ecology, University of California-Davis, Davis, CA 95616, USA.
- \* correspondence: [s.chenoweth@uq.edu.au](mailto:s.chenoweth@uq.edu.au)

**Keywords:** *Drosophila, montium*, PacBio, Celera, long-reads, genome assembly

## ABSTRACT

Long read sequencing technology promises to greatly enhance *de novo* assembly of genomes for non-model species. While error rates have been a large stumbling block, sequencing at high coverage allows reads to be self-corrected. Here we sequence and  
5 *de novo* assemble the genome of *Drosophila serrata*, a non-model species from the *montium* subgroup that has been well studied for clines and sexual selection. Using 11 PacBio SMRT cells, we generated 12 Gbp of raw sequence data comprising approximately 65x whole genome coverage. Read lengths averaged 8,940 bp  
10 (NRead50 12,200) with the longest read at 53 Kbp. We self-corrected reads using the PBDagCon algorithm and assembled the genome using the MHAP algorithm within the PBcR assembler. Total genome length was 198 Mbp with an N50 just under 1 Mbp. Contigs displayed a high degree of arm-level conservation with *D. melanogaster*. We also provide an initial annotation for this genome using *in silico*  
15 gene predictions that were supported by RNA-seq data.

## INTRODUCTION

20 Second-generation sequencing (2GS) platforms, such as Illumina sequencing-by-synthesis, have dramatically reduced genome sequencing costs while increasing throughput exponentially (Shendure and Ji 2008). The relatively low cost and massive throughput of second-generation sequencing platforms have paved the way for sequencing and *de novo* assembly of thousands of species' genomes (Alkan et al. 25 2011). Second-generation sequencing methods generate short reads (less than a few hundred base pairs in length) that have limitations for *de novo* genome assembly, where assembly is performed without the aid of a reference genome (Green 1997; Miller et al. 2008; Nagarajan and Pop 2013; Alkan et al. 2011). With short reads, *de novo* assembly is an inherently difficult computational problem because repetitive 30 DNA sequences are often much longer than the length of each read (Ukkonen 1992). For instance, it has been estimated that short read *de novo* assemblies could be missing up to 20% of sequence information because repeat DNA sequences can increase the number of misassembled and fragmented regions (Schatz et al. 2010; Alkan et al. 2011; Ukkonen 1992). One way to alleviate the problem of repetitive 35 DNA in the *de novo* assembly process has been to incorporate a second set of mate-pair libraries with very long inserts (>2 kbp) (Li et al. 2010; Chaisson et al. 2009; Simpson et al. 2009; Alkan et al. 2011; Butler et al. 2008). Mate-pair libraries can resolve repeats (Treangen and Salzberg 2012; Wetzel et al. 2011) and improve scaffolding (van Heesch et al. 2013), but paired-end contamination and insert size 40 mis-estimation can also lead to mis-assemblies (Phillippy et al. 2008; Sahlin et al. 2016).

More recently, third-generation (3GS) single-molecule sequencing technologies such as Pacific Biosciences' (PacBio) SMRT sequencing and Oxford Nanopore's MinION 45 sequencing, which currently produce much longer reads, up to 54 kbp (Lee et al. 2014) and > 10 kbp (Quick et al. 2014), respectively, can overcome some of the shortcomings of 2GS assembly (Berlin et al. 2015). Although long-read sequencing technology produces reads with a high error rate, ranging from 82.1% (Chin et al. 2011) to 84.6% accuracy (Rasko et al. 2011), sequencing errors occur at more or less 50 random positions across long-reads (Chin et al. 2013) and can be corrected with 2GS

short-read data (Koren et al. 2012) or by using excess 3GS reads for a self-correction (Chin et al. 2013).

In this paper, we use PacBio long-read sequencing to *de novo* assemble the genome of  
55 the fly, *Drosophila serrata*, which has been particularly well studied from an  
evolutionary standpoint. *D. serrata* is a member of the *Drosophila montium* subgroup,  
which split from the *D. melanogaster* subgroup approximately 40 Mya (Tamura et al.  
2004), and consists of an estimated 98 species (Brake and Bächli 2008). At present,  
only one draft genome assembly (*D. kikkawai*) is available (Chen et al. 2014) from  
60 this species-rich subgroup. *D. serrata* has a broad geographical distribution, ranging  
from Papua New Guinea to south eastern Australia and has emerged as a powerful  
model for addressing evolutionary questions such as the evolution of species borders  
(Blows and Hoffman 1993; Hallas et al. 2002; Magiafoglou et al. 2002) and climate  
adaptation (Frentiu and Chenoweth 2010; Kellermann et al. 2009). The species has  
65 also been used to investigate sexual selection (Hine et al. 2002; Chenoweth et al.  
2015), male mate choice (Chenoweth and Blows 2003; Chenoweth et al. 2007), mate  
recognition (Higgie et al. 2000), sexual dimorphism (Chenoweth et al. 2008; Yassin et  
al. 2016), sexual conflict (Delcourt et al. 2009) and indirect genetic effects  
(Chenoweth et al. 2010b). Its cuticular hydrocarbons, which serve as contact  
70 pheromones (Chung et al. 2014), have been extensively used to develop novel  
multivariate quantitative genetic approaches for exploring genetic constraints on  
adaptation (Blows et al. 2004; Chenoweth et al. 2010a; McGuigan et al. 2011b;  
Rundle et al. 2009).

75 Despite the importance of *D. serrata* as a model for evolutionary research, our poor  
understanding of its genome remains a significant limitation. Linkage and physical  
genome maps are available (Stocker et al. 2012), and an expressed sequence tag  
(EST) library has been developed (Frentiu et al. 2009), but the species lacks a draft  
genome. Here we report the sequencing and assembly of the *D. serrata* genome using  
80 exclusively Pacific Biosciences SMRT technology. We also provide an initial  
annotation of the genome based on *in silico* gene predictors and mRNA-seq data. Our  
*de novo* genome and its annotation will provide a resource for ongoing population  
genomic and trait mapping studies in this species as well as facilitate broader studies  
of genome evolution in the family Drosophilidae.

85

## MATERIALS AND METHODS

### *Fly Strains and DNA Extraction*

90 We sequenced a mix of ~100 mg of males and females from a single inbred line that originated from Forster, Australia, and had been inbred via full-sib mating for 10 generations before being maintained at a large population size ( $N \sim 250$  individuals) (McGuigan et al. 2011b). A single further generation of full-sib inbreeding was applied before extraction of DNA. This same inbred line was used for the *D. serrata*  
95 linkage map, was the founding line for previous mutation accumulation studies (Latimer et al. 2015; McGuigan et al. 2014a; McGuigan et al. 2014b; McGuigan et al. 2011a) and is fixed for the light female abdominal pigmentation phenotype mapped by Yassin et al. (2016). High molecular weight DNA was extracted from fly bodies (heads were excluded to reduce eye pigment contamination) using a Qiagen Genra  
100 Puregene Tissue Kit (Cat #158667) which produced fragments  $> 100$  kbp (measured using pulsed-field gel electrophoresis). Two phenol-chloroform extractions were performed by the University of California-Davis DNA Technologies Core prior to preparation of a sequencing library.

### 105 *Genome Sequencing and Assembly*

DNA was sequenced using 11 SMRT cells and P6-C4 chemistry on the Pacific Biosciences RS II platform. In total this produced ~13 billion base pairs spanning 136,119 filtered subreads with a mean read length of 8,840 bp and an N50 of 12,220  
110 bp (Figure S1). The PacBio genome was assembled using the PBcR pipeline that implements the MHAP algorithm within the Celera Assembler (Berlin et al. 2015) and polished with Quiver (Chin et al. 2013) in three steps: (1) errors were corrected in reads using PBDagCon, which requires at least 50x genome coverage and utilizes the consensus of over-sampled sequences (Chin et al. 2013), (2) overlapping sequences  
115 were assembled using MHAP and the Celera Assembler (Berlin et al. 2015), and (3) contigs were polished with Quiver to correct for spurious SNP calls and small indels (Chin et al. 2013). The “sensitive” setting was used for both read correction and genome assembly (Berlin et al. 2015) whereas the default settings were used for

120 polishing with Quiver (Chin et al. 2013). We elected to correct all reads as opposed to  
the default longest 40x. The longest 25x corrected reads were subsequently used for  
genome assembly. The PBDagCon correction was performed on a computer with 60  
CPU cores and 1TB of RAM; 58 CPU cores were used for the assembly and the  
amount of RAM used, although not tracked, was far less than machine capacity. Error  
correction with PBDagCon took ~26 days. Assembly of corrected reads using MHAP  
125 and the Celera Assembler took ~19 hours using 28 CPU cores. Our initial runs using  
the much faster error correction algorithm (HGAP) produced a slightly shorter  
assembly (194 Mbp compared to 198 Mbp) with a slightly lower N50 (0.88 Mbp vs  
0.95 Mbp). We therefore chose to use the more sensitive PBDagCon correction  
method.

130

### ***Transcriptome Sequencing and Assembly***

The same inbred fly strain that was the progenitor for DNA sequencing was also used  
for adult mRNA sequencing to annotate the *D. serrata* genome. Adult males and  
135 females were transferred to fresh vials shortly after eclosion and held in groups of ~25  
where they were allowed to mate and lay eggs for 2 days. They were then sexed under  
light CO<sub>2</sub> anesthesia and snap frozen using liquid nitrogen in groups of 10, at the time  
of freezing all flies were assumed to be non-virgins. Total RNA was extracted from  
each pool of flies using the standard Trizol protocol. Initial quality assessment of the  
140 total RNA using a NanoDrop and gel electrophoresis indicated that the RNA was of  
high quality, with a RNA integrity number (RIN) greater than 7. RNA was stored at -  
80 degrees Celsius for several days before being shipped for sequencing.

One male and one female 75 bp paired-end sequencing library was prepared using the  
145 TruSeq Stranded mRNA Library prep kit and sequenced on an Illumina NextSeq500  
at the Ramaciotti Centre for Genomics, University of New South Wales, Australia. In  
total 79 M and 88 M reads were produced for males and females respectively. Quality  
assessment of the RNA-seq data using FastQC (Andrews 2010) indicated that the  
reads were of a high quality and therefore no trimming of reads was performed. The  
150 transcriptome was *de novo* assembled for each sex separately using Trinity version  
2.1.1 (Grabherr et al. 2011) where all reads were used and the --jaccard\_clip option

was enabled to minimize gene fusion events caused by UTR overlap in high gene density regions.

## 155 **Annotation**

Maker version 2.31.8 (Campbell et al. 2014; Holt and Yandell 2011) was used to annotate the PacBio genome via incorporation of *in silico* gene models detected by Augustus (Stanke and Morgenstern 2005) and/or SNAP (Johnson et al. 2008), the *de*  
160 *novo* *D. serrata* male and female transcriptomes, and protein sequences from 12 *Drosophila* species genomes (*D. ananassae* r1.04, *D. erecta* r1.04, *D. grimshawi* r1.3, *D. melanogaster* r6.07, *D. mojavensis* r1.04, *D. persmillis* r1.3, *D. pseudoobscura pseudoobscura* r3.03, *D. sechellia* 1.3, *D. simulans*, r2.01, *D. virilis* r1.03, *D. willistoni* r1.04, and *D. yakuba* r1.04) obtained from FlyBase (McQuilton et al. 2012;  
165 Attrill et al. 2016). Repeat masking was performed based on *D. melanogaster* training (Smit et al. 1996). Maker was run with default settings apart from allowing Maker to take extra steps to identify alternate splice variants and correct for erroneous gene fusion events.

## 170 **Data Availability Statement**

All sequence data including PacBio and RNA-seq reads have been submitted to public repositories and are available via the *D. serrata* genome NCBI project accession PRJNA355616. The annotation tracks will be made available in gff formats from  
175 [www.chenowethlab.org/resources/serrata\\_genome/](http://www.chenowethlab.org/resources/serrata_genome/) upon publication). We also supply a list of *D. melanogaster* orthologs in supplementary file S1.

## **RESULTS & DISCUSSION**

180 To assemble a draft *D. serrata* genome we sequenced DNA from a pool of adult males and females that originated from a single inbred line to a coverage of approximately 65x using Pacific Bioscience (PacBio) long-read, single-molecule real-time (SMRT) sequencing technology. We produced 136,119 filtered subreads with a mean read length of 8,940 bp and a read N50 of 12,200 bp that spanned greater than  
185 ~13 Gbp (Figure S1). The PacBio reads were assembled using the MHAP algorithm

within the Celera Assembler (Miller et al. 2008; Berlin et al. 2015) after self-correction using PBDagCon (Chin et al. 2013). The final genome was polished with a single iteration of Quiver (Chin et al. 2013) and consisted of 1,360 contigs containing more than 198 Mbp with a GC content of 39.13% (Table 1). The longest contig was  
190 ~7.3 Mbp and the N50 of all contigs was ~0.95 Mbp. Flow cytometry studies suggest that species of the *montium* subgroup commonly have genome lengths over 200 Mbp (Gregory and Johnston 2008) with the estimate for the female *D. serrata* genome being approximately 215 Mbp (0.22 pg). This estimate is in broad agreement with our assembly length of 198 Mbp for the female genome.

195

### ***Completeness***

Genome completeness was assessed using BUSCO gene set analysis version 2.0 which includes a set of 2799 genes specific to Diptera (Simao et al. 2015). The *D.*  
200 *serrata* assembly contained 96.2% of the BUSCO genes with 94.1% being complete single-copy (defined as complete when the gene's length is within two standard deviations of the BUSCO group's mean length) and 2.5% detected as fragmented. Only 1.3% of the BUSCO genes were not found in the assembly (Table 2). In comparison, our analysis of the *D. melanogaster* genome (version r6.05) found it to  
205 contain 98.7% complete BUSCO genes. As a further point of comparison we computed BUSCO metrics for a recent PacBio-only assembly of the *D. melanogaster* ISO1 strain genome using all 790 contigs rather than the 132 that were constructed from > 50 reads only ([http://www.cbcb.umd.edu/software/PBcR/MHAP/\[quivered full assembly\]](http://www.cbcb.umd.edu/software/PBcR/MHAP/[quivered_full_assembly])). We also analysed the only other member of the *montium* subgroup  
210 with a publically available genome assembly, *D. kikkawai*, (<https://www.hgsc.bcm.edu/arthropods/drosophila-modencode-project>; NCBI PRJNA62319). Although these assemblies also tended to contain marginally lower numbers of missing BUSCOs, metrics were generally very similar (Table 2) indicating high level of completeness for the *D. serrata* assembly.

215

### ***Fragmentation and Mis-assemblies***

Although our assembly N50 was at the upper end of what might be expected for a short read assembly, it is much lower than a recent PacBio only assembly of the *D.*



220 *melanogaster* genome (Berlin et al. 2015). There are several reasons why this might  
be the case. First, we report metrics on all contigs in the assembly rather than  
excluding those that incorporated fewer than 50 reads as was the case for the *D.*  
*melanogaster* assembly (Berlin et al. 2015). Excluding such contigs resulted in an  
assembly of only 273 contigs with a total genome length of 175 Mbp (vs. 198Mbp)  
225 and an N50 of 1.4 Mbp. In this reduced assembly, half of the genome was represented  
in only 25 contigs, which is closer to the performance seen for *D. melanogaster*.  
While contigs with less than 50 read support were generally short (median: 23.5 kbp,  
range: 6.3-110 kbp) and may be excluded in some cases on the basis of quality, when  
we examined the *D. serrata* annotation data we saw that many of these contigs  
230 contained predicted genes that had RNA-seq support, including 14 complete single-  
copy BUSCOs. We have therefore retained all contigs in our assembly.

Second, although our N50 filtered subread length of 12,200 kbp is on par with the *D.*  
*melanogaster* P5C3 filtered subread lengths (12.2-14.2 kbp) (Kim et al. 2014), we had  
235 approximately half the coverage of the *D. melanogaster* assembly (65x vs 130x),  
which may have reduced our ability to span repetitive regions of the *D. serrata*  
genome. To examine this further, we reran the PBcR pipeline with *D. melanogaster*  
data from (Kim et al. 2014) but downsampled it to 65x. We did not see genome  
contiguity drop to the levels seen for *D. serrata* (data not shown) and note that similar  
240 findings were observed by Chakraborty et al. (2016; Figure 5). It therefore seems  
likely that the *D. serrata* genome, which is longer than that of *D. melanogaster*, may  
contain longer repetitive regions. Therefore, adequate repeat-spanning coverage  
would presumably require additional very long reads to achieve the same assembly  
contiguity seen for *D. melanogaster*. A third factor possibly contributing to a higher  
245 degree of fragmentation in our assembly is residual heterozygosity which may have  
been higher in our *D. serrata* line, which had at least 11 generations of inbreeding,  
than the ISO1 *D. melanogaster* line.

Because physical maps indicate very strong chromosome arm-level conservation of  
250 gene content between *D. serrata* and *D. melanogaster* (Stocker et al. 2012), we  
examined possible mis-assemblies between chromosomal arms by aligning the six  
largest contigs (total length ~ 37 Mbp) to the *D. melanogaster* genome using  
MUMmer (Kurtz et al. 2004). If there were no chromosome arm misplacements, then

it was expected that each contig would align to a single *D. melanogaster* chromosome  
255 arm, albeit fragmented due to changes in gene order. This was largely the case (Figure  
1A), where each contig aligned to a single *D. melanogaster* chromosome arm but with  
minor sections of alignment to other chromosome arms towards the contig edges  
where repetitive elements were more likely to be found. The one major exception to  
this general pattern of conservation was the longest contig in the assembly, contig  
260 3208, that aligned mainly to *D. melanogaster* 3R but contained an approximately 600  
kbp segment that aligned to *D. melanogaster* 3L. To test whether this was likely to be  
a mis-assembly, we searched the contig for previously published SNP markers that  
have been placed on the *D. serrata* linkage map. The marker m25 (Stocker et al  
2012), which maps to 3L, was located in the suspected mis-assembled region (contig  
265 3208, position 3,537,591) indicating that a mis-assembly rather than a genomic  
translocation rearrangement between 3R and 3L was most likely. The conservation of  
chromosome arm-level gene content was a common feature of the remaining contigs  
as well. For instance, while only 354 contigs contained significant tBLASTx hits to at  
least one *D. melanogaster* gene (genome version 6.05), these contigs spanned 167  
270 Mbp, and the vast majority had greater than 95% tBLASTx hits to a single *D.*  
*melanogaster* chromosomal arm (mean = 96.35%, median = 100%) (Figure 2).

### ***Annotation***

275 To facilitate annotation of the *D. serrata* genome we sequenced mRNA from male  
and female adult flies. The *in silico* gene predictors SNAP (Johnson et al. 2008) and  
Augustus (Stanke and Morgenstern 2005), found 22,718 and 15,984 genes  
respectively. Of these *in silico* predicted genes, a total of 14,271 protein coding genes  
were sufficiently supported by RNA-seq and/or protein sequence data to be annotated  
280 by Maker2 (16,202 transcripts) (Holt and Yandell 2011). While the number of genes  
we annotated in *D. serrata* is similar to the 13,929 protein coding genes that have  
currently been annotated in *D. melanogaster* (genome version 6.05), we annotated far  
fewer total transcripts (31,482 identified in *D. melanogaster*) (Attrill et al. 2016), this  
is likely due to the larger number of tissue types and life stages for which *D.*  
285 *melanogaster* gene expression has been characterized with RNA-seq. Maker scores  
annotations using the annotation edit distance (AED), a zero-to-one score where a  
value of zero indicates that the *in silico* annotation and the empirical evidence are in

perfect agreement and a value of one indicates that the *in silico* annotation has no support from empirical data (Eilbeck et al. 2009). The AED for the *D. serrata* genome  
290 had a mean score of 0.18 and median of 0.13 suggesting that most annotations were of high quality with strong empirical support. Considering that in *Drosophila* appreciable numbers of genes peak in expression during early life stages such as embryogenesis (Arbeitman et al. 2002), our use of adult fly RNA-seq data may mean that some such genes are yet to be annotated. Furthermore, as we used mRNA-seq we  
295 have not yet annotated non-coding genes of which there are 3,503 in the *D. melanogaster* genome (Attrill et al. 2016). Future RNA-seq datasets will be used to update the existing gene models.

We observed differences in gene, exon and intron lengths between *D. serrata* and *D. melanogaster*. In *D. serrata* there were on average 3.9 exons per protein coding gene and the gene, exon, and intron lengths were 4,655 bp, 451 bp, and 699 bp respectively. Apart from average exon number which does not differ between the two species, these values are lower than those for *D. melanogaster* protein coding genes (genome version 6.05): where the mean gene, exon, and intron lengths are 6,962 bp,  
305 539 bp, and 1,704 bp respectively (Attrill et al. 2016). The lower average intron length observed in *D. serrata* may be a consequence of annotating far fewer alternate splice variants. In total, coding sequence comprised 33.6% of the genome when including introns and 15.4% of the genome when considering only exons. Lower percentage intron content has been associated with overall longer genomes in the  
310 Drosophilidae (Gregory and Johnston 2008) which is consistent with our observations here.

Many of the annotated genes in *D. serrata* were found to be putative orthologs of *D. melanogaster* genes (Supp data file S1). In total 13,141 (92%) were found to be  
315 orthologs via best reciprocal BLAST (Huynen and Bork 1998; Moreno-Hagelsieb and Latimer 2008; Tatusov et al. 1997) using tBLASTx with default settings (Camacho et al. 2009) and version 6.05 of the *D. melanogaster* genome (Drosophila 12 Genomes et al. 2007; McQuilton et al. 2012). The median e-value was zero whereas the mean when comparing *D. serrata* genes to *D. melanogaster* was  $2.37e^{-04}$  and when  
320 comparing *D. melanogaster* genes to *D. serrata* was  $1.55e^{-05}$ , the correlation between e-values for the reciprocal BLAST was 0.88.

## **Conclusion**

325 We have assembled a draft genome for a species with no existing genome using only  
3GS data. Our study indicates the feasibility of long read-only genome assembly for  
non-model species with modest sized genomes when using an inbred line. While  
either greater 3GS coverage or a hybrid merged assembly (Chakraborty et al. 2016)  
may be required to provide greater genome contiguity, it is clear the genome has a  
330 high degree of completeness in terms of gene content and that mis-assemblies at  
chromosome arm level are rare. The genome and its initial annotation provide a useful  
resource of future population genomic and trait mapping studies in this species.

## **ACKNOWLEDGEMENTS**

335 We thank S. Koren for advice regarding the PBcR pipeline. Funding for this research  
was provided by The University of Queensland.

## **REFERENCES**

- 340
- Alkan, C., S. Sajjadian, and E.E. Eichler, 2011 Limitations of next-generation genome  
sequence assembly. *Nat Methods* 8 (1):61-65.
- Andrews, S., 2010 FastQC: A quality control tool for high throughput sequence data.  
*Reference Source*.
- 345 Arbeitman, M.N., E.E. Furlong, F. Imam, E. Johnson, B.H. Null *et al.*, 2002 Gene  
expression during the life cycle of *Drosophila melanogaster*. *Science* 297  
(5590):2270-2275.
- Attrill, H., K. Falls, J.L. Goodman, G.H. Millburn, G. Antonazzo *et al.*, 2016  
FlyBase: establishing a Gene Group resource for *Drosophila melanogaster*.  
350 *Nucleic Acids Res* 44 (D1):D786-792.
- Berlin, K., S. Koren, C.-S. Chin, J.P. Drake, J.M. Landolin *et al.*, 2015 Assembling  
large genomes with single-molecule sequencing and locality-sensitive hashing.  
*Nat Biotechnol*.
- Blows, M.W., S.F. Chenoweth, and E. Hine, 2004 Orientation of the genetic variance-  
covariance matrix and the fitness surface for multiple male sexually selected  
355 traits. *Am Nat* 163 (3):329-340.
- Blows, M.W., and A.A. Hoffman, 1993 The genetics of central and marginal  
populations of *Drosophila serrata*. I. Genetic variation for stress resistance and  
species borders. *Evolution*:1255-1270.
- 360 Brake, I., and G. Bächli, 2008 *Drosophilidae (Diptera)*: Brill.

- Butler, J., I. MacCallum, M. Kleber, I.A. Shlyakhter, M.K. Belmonte *et al.*, 2008  
ALLPATHS: de novo assembly of whole-genome shotgun microreads.  
*Genome Res* 18 (5):810-820.
- 365 Camacho, C., G. Coulouris, V. Avagyan, N. Ma, J. Papadopoulos *et al.*, 2009  
BLAST+: architecture and applications. *BMC Bioinformatics* 10 (1):421.
- Campbell, M.S., C. Holt, B. Moore, and M. Yandell, 2014 Genome Annotation and  
Curation Using MAKER and MAKER-P. *Current Protocols in  
Bioinformatics*:4.11. 11-14.11. 39.
- 370 Chaisson, M.J., D. Brinza, and P.A. Pevzner, 2009 De novo fragment assembly with  
short mate-paired reads: Does the read length matter? *Genome Research* 19  
(2):336-346.
- Chakraborty, M., J.G. Baldwin-Brown, A.D. Long, and J.J. Emerson, 2016  
Contiguous and accurate de novo assembly of metazoan genomes with modest  
long read coverage. *Nucleic Acids Res* 44 (19):e147.
- 375 Chen, Z.X., D. Sturgill, J. Qu, H. Jiang, S. Park *et al.*, 2014 Comparative validation of  
the *D. melanogaster* modENCODE transcriptome annotation. *Genome Res* 24  
(7):1209-1223.
- Chenoweth, S.F., N.C. Appleton, S.L. Allen, and H.D. Rundle, 2015 Genomic  
Evidence that Sexual Selection Impedes Adaptation to a Novel Environment.  
380 *Current Biology* 25 (14):1860-1866.
- Chenoweth, S.F., and M.W. Blows, 2003 Signal trait sexual dimorphism and mutual  
sexual selection in *Drosophila serrata*. *Evolution* 57 (10):2326-2334.
- Chenoweth, S.F., D. Petfield, P. Doughty, and M.W. Blows, 2007 Male choice  
generates stabilizing sexual selection on a female fecundity correlate. *J Evol  
385 Biol* 20 (5):1745-1750.
- Chenoweth, S.F., H.D. Rundle, and M.W. Blows, 2008 Genetic constraints and the  
evolution of display trait sexual dimorphism by natural and sexual selection.  
*Am Nat* 171 (1):22-34.
- Chenoweth, S.F., H.D. Rundle, and M.W. Blows, 2010a The contribution of selection  
390 and genetic constraints to phenotypic divergence. *Am Nat* 175 (2):186-196.
- Chenoweth, S.F., H.D. Rundle, and M.W. Blows, 2010b Experimental evidence for  
the evolution of indirect genetic effects: changes in the interaction effect  
coefficient,  $\psi$ , due to sexual selection. *Evolution* 64 (6):1849-1856.
- Chin, C.S., D.H. Alexander, P. Marks, A.A. Klammer, J. Drake *et al.*, 2013  
395 Nonhybrid, finished microbial genome assemblies from long-read SMRT  
sequencing data. *Nat Methods* 10 (6):563-569.
- Chin, C.S., J. Sorenson, J.B. Harris, W.P. Robins, R.C. Charles *et al.*, 2011 The origin  
of the Haitian cholera outbreak strain. *N Engl J Med* 364 (1):33-42.
- 400 Chung, H., D.W. Loehlin, H.D. Dufour, K. Vaccarro, J.G. Millar *et al.*, 2014 A Single  
Gene Affects Both Ecological Divergence and Mate Choice in *Drosophila*.  
*Science* 343 (6175):1148-1151.
- Delcourt, M., M.W. Blows, and H.D. Rundle, 2009 Sexually antagonistic genetic  
variance for fitness in an ancestral and a novel environment. *Proc Biol Sci* 276  
(1664):2009-2014.
- 405 *Drosophila* 12 Genomes, C., A.G. Clark, M.B. Eisen, D.R. Smith, C.M. Bergman *et al.*, 2007 Evolution of genes and genomes on the *Drosophila* phylogeny.  
*Nature* 450 (7167):203-218.
- Eilbeck, K., B. Moore, C. Holt, and M. Yandell, 2009 Quantitative measures for the  
management and comparison of annotated genomes. *BMC Bioinformatics* 10  
410 (1):67.

- Frentiu, F.D., M. Adamski, E.A. McGraw, M.W. Blows, and S.F. Chenoweth, 2009 An expressed sequence tag (EST) library for *Drosophila serrata*, a model system for sexual selection and climatic adaptation studies. *BMC Genomics* 10:40.
- 415 Frentiu, F.D., and S.F. Chenoweth, 2010 Clines in cuticular hydrocarbons in two *Drosophila* species with independent population histories. *Evolution* 64 (6):1784-1794.
- Grabherr, M.G., B.J. Haas, M. Yassour, J.Z. Levin, D.A. Thompson *et al.*, 2011 Full-length transcriptome assembly from RNA-Seq data without a reference genome. *Nat Biotechnol* 29 (7):644-652.
- 420 Green, P., 1997 Against a whole-genome shotgun. *Genome Research* 7 (5):410-417.
- Gregory, T.R., and J.S. Johnston, 2008 Genome size diversity in the family Drosophilidae. *Heredity (Edinb)* 101 (3):228-238.
- Hallas, R., M. Schiffer, and A.A. Hoffmann, 2002 Clinal variation in *Drosophila serrata* for stress resistance and body size. *Genet Res* 79 (2):141-148.
- 425 Higgie, M., S. Chenoweth, and M.W. Blows, 2000 Natural selection and the reinforcement of mate recognition. *Science* 290 (5491):519-521.
- Hine, E., S. Lachish, M. Higgie, and M.W. Blows, 2002 *Positive genetic correlation between female preference and offspring fitness.*
- 430 Holt, C., and M. Yandell, 2011 MAKER2: an annotation pipeline and genome-database management tool for second-generation genome projects. *BMC Bioinformatics* 12 (1):491.
- Huynen, M.A., and P. Bork, 1998 Measuring genome evolution. *Proc Natl Acad Sci U S A* 95 (11):5849-5856.
- 435 Johnson, A.D., R.E. Handsaker, S.L. Pulit, M.M. Nizzari, C.J. O'Donnell *et al.*, 2008 SNAP: a web-based tool for identification and annotation of proxy SNPs using HapMap. *Bioinformatics* 24 (24):2938-2939.
- Kellermann, V., B. van Heerwaarden, C.M. Sgro, and A.A. Hoffmann, 2009 Fundamental evolutionary limits in ecological traits drive *Drosophila* species distributions. *Science* 325 (5945):1244-1246.
- 440 Kim, K.E., P. Peluso, P. Babayan, P.J. Yeadon, C. Yu *et al.*, 2014 Long-read, whole-genome shotgun sequence data for five model organisms. *Sci Data* 1:140045.
- Koren, S., M.C. Schatz, B.P. Walenz, J. Martin, J.T. Howard *et al.*, 2012 Hybrid error correction and de novo assembly of single-molecule sequencing reads. *Nat Biotechnol* 30 (7):693-700.
- 445 Kurtz, S., A. Phillippy, A.L. Delcher, M. Smoot, M. Shumway *et al.*, 2004 Versatile and open software for comparing large genomes. *Genome Biol* 5 (2):R12.
- Latimer, C.A., B.R. Foley, and S.F. Chenoweth, 2015 Connecting thermal performance curve variation to the genotype: a multivariate QTL approach. *J Evol Biol* 28 (1):155-168.
- 450 Lee, H., J. Gurtowski, S. Yoo, S. Marcus, W.R. McCombie *et al.*, 2014 Error correction and assembly complexity of single molecule sequencing reads. *BioRxiv*:006395.
- Li, R., H. Zhu, J. Ruan, W. Qian, X. Fang *et al.*, 2010 De novo assembly of human genomes with massively parallel short read sequencing. *Genome Res* 20 (2):265-272.
- 455 Magiafoglou, A., M. Carew, and A. Hoffmann, 2002 Shifting clinal patterns and microsatellite variation in *Drosophila serrata* populations: a comparison of populations near the southern border of the species range. *Journal of Evolutionary Biology* 15 (5):763-774.
- 460

- McGuigan, K., J.M. Collet, S.L. Allen, S.F. Chenoweth, and M.W. Blows, 2014a Pleiotropic mutations are subject to strong stabilizing selection. *Genetics* 197 (3):1051-1062.
- 465 McGuigan, K., J.M. Collet, E.A. McGraw, Y.H. Ye, S.L. Allen *et al.*, 2014b The nature and extent of mutational pleiotropy in gene expression of male *Drosophila serrata*. *Genetics* 196 (3):911-921.
- McGuigan, K., D. Petfield, and M.W. Blows, 2011a Reducing mutation load through sexual selection on males. *Evolution* 65 (10):2816-2829.
- 470 McGuigan, K., L. Rowe, and M.W. Blows, 2011b Pleiotropy, apparent stabilizing selection and uncovering fitness optima. *Trends Ecol Evol* 26 (1):22-29.
- McQuilton, P., S.E. St Pierre, J. Thurmond, and C. FlyBase, 2012 FlyBase 101--the basics of navigating FlyBase. *Nucleic Acids Res* 40 (Database issue):D706-714.
- 475 Miller, J.R., A.L. Delcher, S. Koren, E. Venter, B.P. Walenz *et al.*, 2008 Aggressive assembly of pyrosequencing reads with mates. *Bioinformatics* 24 (24):2818-2824.
- Moreno-Hagelsieb, G., and K. Latimer, 2008 Choosing BLAST options for better detection of orthologs as reciprocal best hits. *Bioinformatics* 24 (3):319-324.
- 480 Nagarajan, N., and M. Pop, 2013 Sequence assembly demystified. *Nat Rev Genet* 14 (3):157-167.
- Phillippy, A.M., M.C. Schatz, and M. Pop, 2008 Genome assembly forensics: finding the elusive mis-assembly. *Genome Biol* 9 (3):R55.
- Quick, J., A.R. Quinlan, and N.J. Loman, 2014 A reference bacterial genome dataset generated on the MinION portable single-molecule nanopore sequencer. *Gigascience* 3 (22):22.
- 485 Rasko, D.A., D.R. Webster, J.W. Sahl, A. Bashir, N. Boisen *et al.*, 2011 Origins of the *E. coli* strain causing an outbreak of hemolytic-uremic syndrome in Germany. *N Engl J Med* 365 (8):709-717.
- Rundle, H.D., S.F. Chenoweth, and M.W. Blows, 2009 The diversification of mate preferences by natural and sexual selection. *J Evol Biol* 22 (8):1608-1615.
- 490 Sahlin, K., R. Chikhi, and L. Arvestad, 2016 Assembly scaffolding with PE-contaminated mate-pair libraries. *Bioinformatics* 32 (13):1925-1932.
- Schatz, M.C., A.L. Delcher, and S.L. Salzberg, 2010 Assembly of large genomes using second-generation sequencing. *Genome Research* 20 (9):1165-1173.
- 495 Shendure, J., and H. Ji, 2008 Next-generation DNA sequencing. *Nat Biotechnol* 26 (10):1135-1145.
- Simao, F.A., R.M. Waterhouse, P. Ioannidis, E.V. Kriventseva, and E.M. Zdobnov, 2015 BUSCO: assessing genome assembly and annotation completeness with single-copy orthologs. *Bioinformatics* 31 (19):3210-3212.
- 500 Simpson, J.T., K. Wong, S.D. Jackman, J.E. Schein, S.J. Jones *et al.*, 2009 ABySS: a parallel assembler for short read sequence data. *Genome Res* 19 (6):1117-1123.
- Smit, A.F., R. Hubley, and P. Green, 1996 RepeatMasker Open-3.0.
- Stanke, M., and B. Morgenstern, 2005 AUGUSTUS: a web server for gene prediction in eukaryotes that allows user-defined constraints. *Nucleic Acids Research* 33 (suppl 2):W465-W467.
- 505 Stocker, A.J., B.B. Rusuwa, M.J. Blacket, F.D. Frentiu, M. Sullivan *et al.*, 2012 Physical and Linkage Maps for *Drosophila serrata*, a Model Species for Studies of Clinal Adaptation and Sexual Selection. *G3 (Bethesda)* 2 (2):287-297.
- 510

- Tamura, K., S. Subramanian, and S. Kumar, 2004 Temporal patterns of fruit fly (*Drosophila*) evolution revealed by mutation clocks. *Mol Biol Evol* 21 (1):36-44.
- 515 Tatusov, R.L., E.V. Koonin, and D.J. Lipman, 1997 A genomic perspective on protein families. *Science* 278 (5338):631-637.
- Treangen, T.J., and S.L. Salzberg, 2012 Repetitive DNA and next-generation sequencing: computational challenges and solutions. *Nature Reviews Genetics* 13 (1):36-46.
- 520 Ukkonen, E., 1992 Approximate String-Matching with Q-Grams and Maximal Matches. *Theoretical computer science* 92 (1):191-211.
- van Heesch, S., W.P. Kloosterman, N. Lansu, F.-P. Ruzius, E. Levandowsky *et al.*, 2013 Improving mammalian genome scaffolding using large insert mate-pair next-generation sequencing. *BMC Genomics* 14 (1):1.
- 525 Wetzel, J., C. Kingsford, and M. Pop, 2011 Assessing the benefits of using mate-pairs to resolve repeats in de novo short-read prokaryotic assemblies. *BMC Bioinformatics* 12 (1):1.
- Yassin, A., E.K. Delaney, A.J. Reddiex, T.D. Seher, H. Bastide *et al.*, 2016 The pdm3 locus is a hotspot for recurrent evolution of female-limited color dimorphism in *Drosophila*. *Current Biology* 26 (18):2412-2422.
- 530



## Figures and Tables

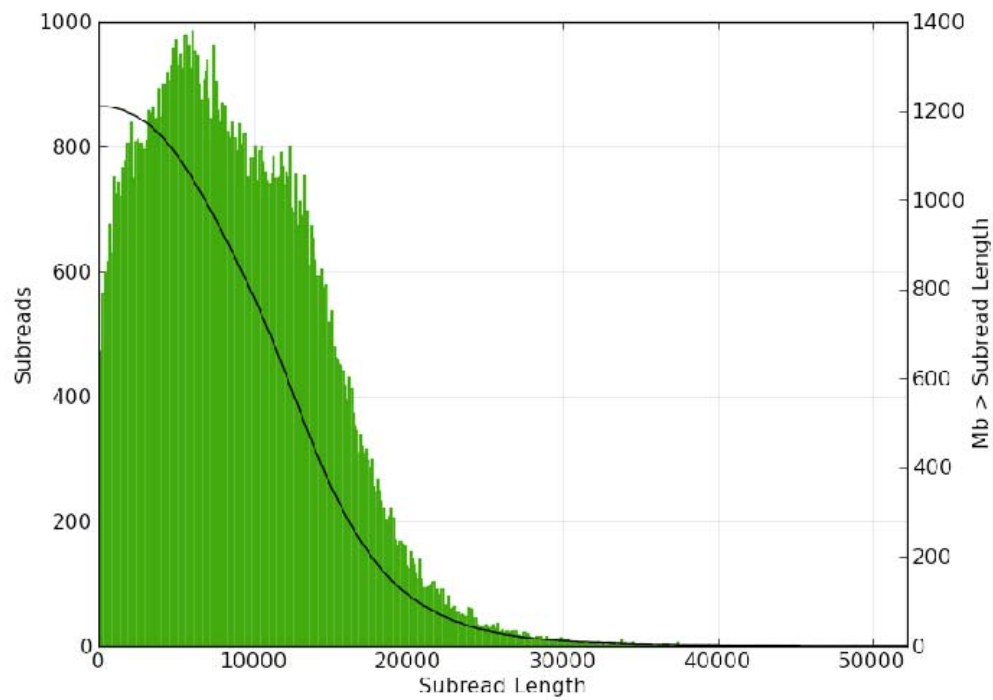

Supplementary figure 1. Distribution of filtered subread lengths from 11 SMRT cells  
535 on the RS II with P6C4 chemistry.

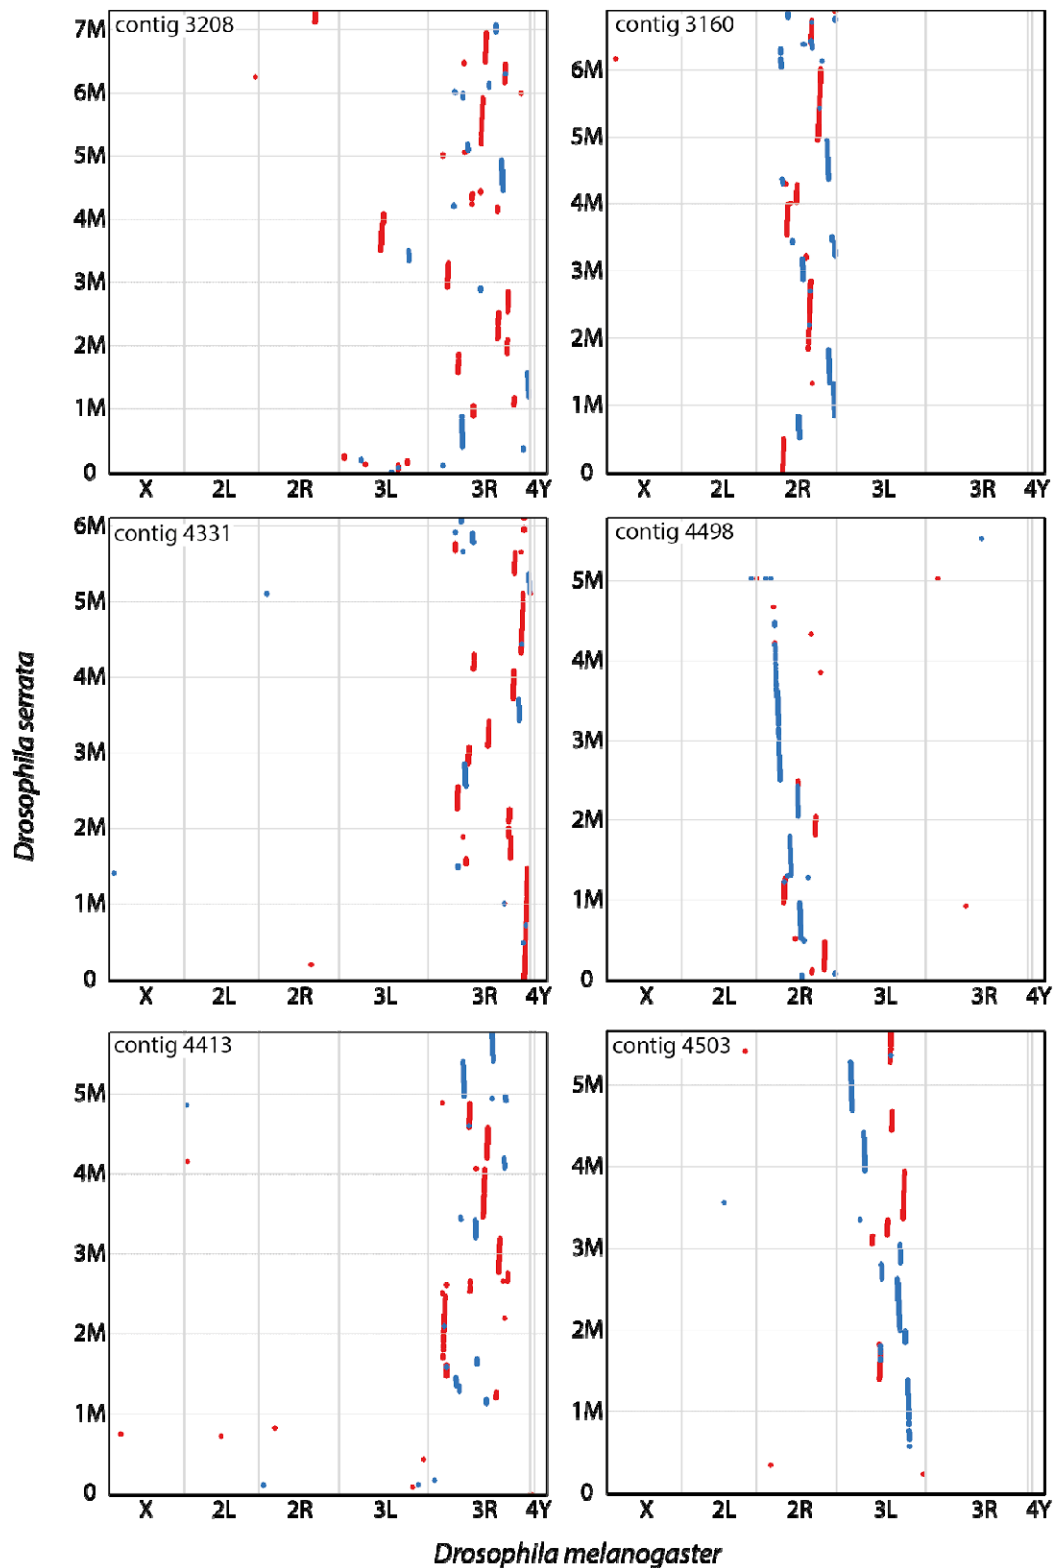

540 Figure 1. Alignment of the six longest contigs from the *D.serrata* assembly, to the *D. melanogaster* genome version 6.05. Red dots indicate a MUMmer hit that aligns to the *D. melanogaster* genome in the forward orientation; blue dots indicate a MUMmer hit that aligns to the *D. melanogaster* genome in the reverse orientation.

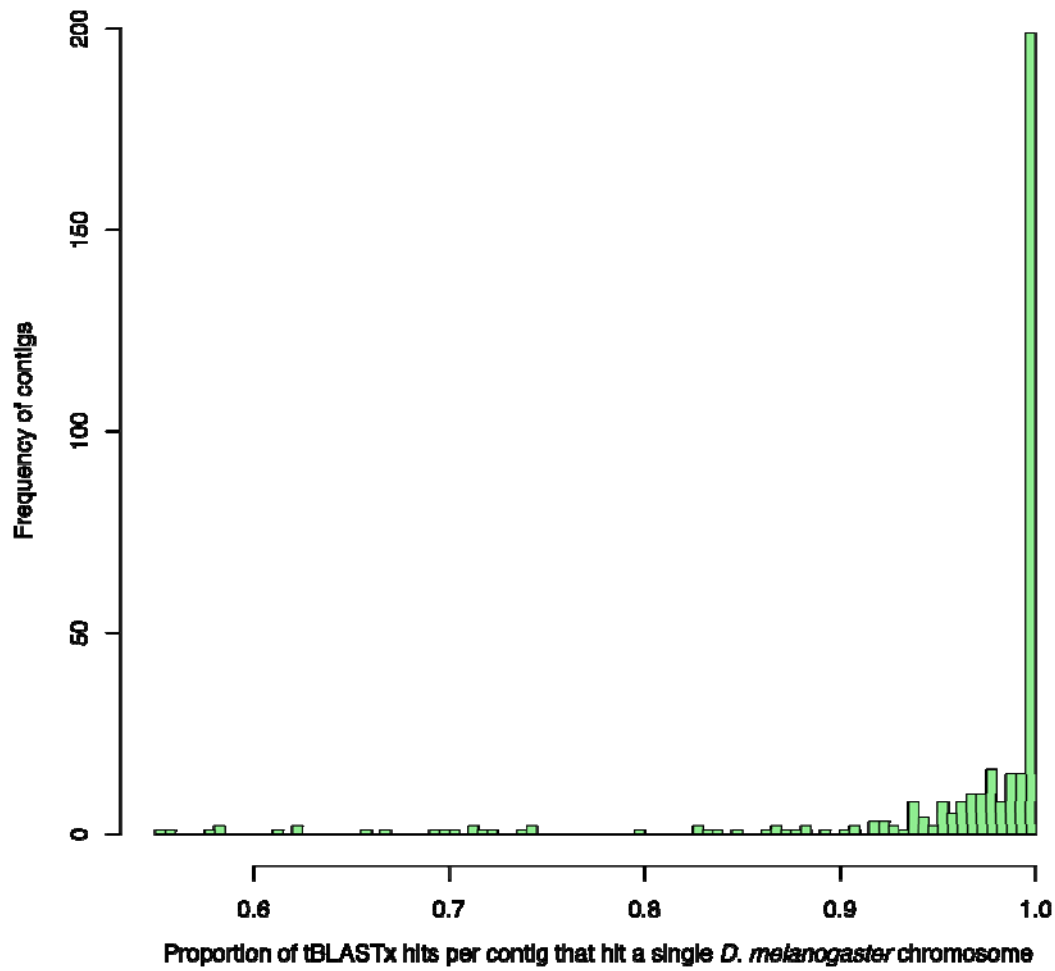

545

Figure 2. Comparison of *D. serrata* gene locations relative to *D. melanogaster*. On average > 95% of tBLASTx hits to *D. melanogaster* genes (version 6.05) in each contig map to a single *D. melanogaster* chromosome arm.

550

555

560

Table 1. *D. serrata* genome assembly statistics. Contig length percentages refer to percent total length in each size bin.

| Description         |             |
|---------------------|-------------|
| Number of contigs   | 1,360       |
| Genome size (bp)    | 198,298,763 |
| Longest contig (bp) | 7,300,740   |
| < 1 Kbp             | 0.0%        |
| 1-10 Kbp            | 3.3%        |
| 10-100 Kbp          | 78.8%       |
| 100-1000 Kbp        | 15.3%       |
| > 1 Mbp             | 2.6%        |
| N50 (bp)            | 942,627     |
| GC content          | 39.13%      |

565

Table 2. BUSCO gene content assessment for *D. serrata* and two different *D. melanogaster* assemblies, version r6.05 from [www.flybase.org](http://www.flybase.org), and the full ISO 1 pacbio assembly of Berlin et al. (2015) consisting of 790 contigs, also constructed with the PBcR pipeline. A total of 2799 BUSCOs were searched that form a set of highly conserved Dipteran genes.

570

| Category              | <i>D. serrata</i> | <i>D. kikkawai</i> | <i>D. melanogaster</i> |        |
|-----------------------|-------------------|--------------------|------------------------|--------|
|                       |                   |                    | r6.05                  | PacBio |
| Complete BUSCOs:      |                   |                    |                        |        |
| Single-copy (%)       | 94.1              | 97.1               | 98.2                   | 97.7   |
| Duplicated (%)        | 2.1               | 1.0                | 0.5                    | 0.6    |
| Fragmented BUSCOs (%) | 2.5               | 1.2                | 0.8                    | 0.8    |
| Missing BUSCOs (%)    | 1.3               | 0.8                | 0.5                    | 0.9    |

575 Supplementary Table 1. List of *D. serrata* to *D. melanogaster* orthologs.
